# Supplementary material for: Sustainable fermentable sugar production using a glass fiber supported gallium–molybdenum photocatalyst towards bioethanol production: LCA analysis
Source: Royal Society of Chemistry journal article supplement (doi:10.1039/d4ya00226a), 2024-01-01
Supplement: d4ya00226a1.pdf [file d4ya00226a1.pdf]

## Sustainable fermentable sugar production using glass fiber supported gallium-molybdenum photocatalyst towards bioethanol: LCA analysis

Rajat Chakraborty<sup>\*a</sup>, Sourav Barman<sup>a</sup>, and Aritro Sarkar<sup>a</sup>

**Table S1.** Analysis of Variance

| Source                    | DF | Adj. SS | Adj. MS | F-Value | P-Value |
|---------------------------|----|---------|---------|---------|---------|
| Regression                | 4  | 1108.72 | 277.179 | 4.84    | 0.078   |
| (R <sub>T</sub> ) (°C)    | 1  | 522.67  | 522.667 | 9.13    | 0.039   |
| (R <sub>t</sub> ) (min)   | 1  | 3.29    | 3.286   | 0.06    | 0.822   |
| (C <sub>c</sub> ) (wt. %) | 1  | 512.45  | 512.450 | 8.95    | 0.040   |
| (P <sub>L</sub> ) (wt. %) | 1  | 70.32   | 70.315  | 1.23    | 0.330   |
| Error                     | 4  | 228.94  | 57.235  |         |         |
| Total                     | 8  | 1337.66 |         |         |         |

### S1. Pretreatment of corncob

The procured corncob was carefully cleaned with hot water and dried. It was then grounded to produce uniformly fine particles (-250 ~ +300 mesh screen). To separate lignin, 40g corn cob was heated for 3 hours at 80 °C with a 100 ml acetic acid plus H<sub>2</sub>O<sub>2</sub> mix solution (9: 1) solution. The resultant mixture was then filtered and the residue was collected. The residue was then washed with hot water and ultra-sonicated for 30mins. It was then filtered and the residue was dried overnight in a hot air oven at 60°C. This DCC (delignified corncob) was then used for experimental runs.

### S2. Compositional analysis of corncob and DCC

The composition of the corncob and DCC was analyzed for cellulose, hemicellulose and lignin content. The lignin content was measured by measuring the weight difference of the corncob before and after the treatment with peroxide acetic acid. The cellulose and hemicellulose content were calculated by completely hydrolyzing the corncob with conc. H<sub>2</sub>SO<sub>4</sub> and measuring the glucose (for cellulose) and xylose (for hemicellulose) content in the hydrolysate by using HPLC analysis. The method was repeated for the compositional analysis of DCC. The compositional analysis of corncob and DCC are presented in Table S2. Furthermore, the DCC's carbon, hydrogen, nitrogen and sulfur content has been analyzed using CHNS analyzer, and the results are given in Table S3.

**Table S2.** Composition of corncob and DCC

| Biomass | Cellulose (wt. %) | Hemicellulose (wt. %) | Lignin (wt. %) |
|---------|-------------------|-----------------------|----------------|
| Corncob | 33.54             | 32.16                 | 17.3           |
| DCC     | 75.14             | 22.65                 | 2.1            |

**Table S3.** CHNS analysis of DCC

| Carbon (%) | Hydrogen (%) | Nitrogen (%) | Sulphur (%) |
|------------|--------------|--------------|-------------|
| 43.30      | 5.686        | 0.39         | 0.219       |

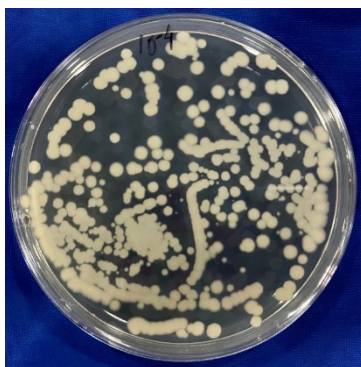

Fig. 1S: Colonies of *P. stipitis* NCIM 3499

<sup>a</sup> Chemical Engineering Department, Jadavpur University, Kolkata-700032, India

\*. Corresponding Author, Tel: +91 3324572689; fax: +91 3324146378

Email: rajat\_chakraborty25@yahoo.com; [rajat.chakraborty@jadavpuruniversity.in](mailto:rajat.chakraborty@jadavpuruniversity.in)

†Electronic supplementary information (ESI) available.

**Table S4.** LCI data for preparation of 1 kg powdered W-PCB powder

| Category         | Flow               | Value         | Unit  | Comments                                                                                                        |
|------------------|--------------------|---------------|-------|-----------------------------------------------------------------------------------------------------------------|
| Energy Input     | Electricity        | 0.50          | kWh   |                                                                                                                 |
| Material Input   | W-PCB              | 1.0097        | Kg    |                                                                                                                 |
|                  | NaOH               | 0.80          |       |                                                                                                                 |
| Emissions to air | Waste Heat         | 1.80          | MJ    |                                                                                                                 |
|                  | Particulates <10µm | 0.0097        | Kg    |                                                                                                                 |
| Transports       | W-PCB              | 0.0063        | Kg*Km | Transport by lorry, capacity: 16 metric ton, EURO IV / BS IV (assuming all materials came from 100 km distance) |
|                  | NaOH               | 0.005         |       |                                                                                                                 |
|                  | <b>Total</b>       | <b>0.0113</b> |       |                                                                                                                 |
| Output           | Powdered W-PCB     | 1             | kg    |                                                                                                                 |

**Table S5.** LCI data for treatment of 1 kg of powdered W-PCB

| Category                     | Flow                          | Value         | Unit  | Comments                                |
|------------------------------|-------------------------------|---------------|-------|-----------------------------------------|
| Energy Input                 | Energy consumed               |               | kWh   |                                         |
|                              | For magnetic stirring         | 0.05          |       |                                         |
|                              | Peroxyacetic acid treatment   | 0.2           |       |                                         |
|                              | During ultrasonication        | 0.1875        |       |                                         |
|                              | For Oven drying               | 0.8           |       |                                         |
|                              | <b>Total</b>                  | <b>1.2375</b> |       |                                         |
| Material Input               | Powdered W-PCB                | 1             | kg    |                                         |
|                              | DMF                           | 0.188         |       |                                         |
|                              | Acetic Acid                   | 0.12          |       |                                         |
|                              | H <sub>2</sub> O <sub>2</sub> | 0.066         |       |                                         |
|                              | DI Water                      | 3.25          |       |                                         |
| Emissions to air             | Waste Heat                    | 4.455         | MJ    | Assuming 5% water vapour emitted to air |
|                              | Water Vapour                  | 0.184         | Kg    |                                         |
| Transports                   | DMF                           | 0.0012        | Kg*Km |                                         |
|                              | Acetic Acid                   | 0.00075       |       |                                         |
|                              | H <sub>2</sub> O <sub>2</sub> | 0.00041       |       |                                         |
|                              | DI Water                      | 0.020         |       |                                         |
|                              | <b>Total</b>                  | <b>0.0224</b> |       |                                         |
| Waste of Materials<br>Output | Waste Water                   | 0.425         | Kg    |                                         |
|                              | Glass Fiber                   | 0.30          | Kg    |                                         |
|                              | Copper Acetate                | 0.19          |       |                                         |
|                              | Iron Scrap                    | 0.0079        |       |                                         |

**Table S6.** LCI data for preparation of 1 kg Ga<sup>4</sup>-Mo-GF catalyst

| Category         | Flow                                       | Value    | Unit  | Comments                                        |
|------------------|--------------------------------------------|----------|-------|-------------------------------------------------|
| Energy Input     | Traditional heating                        | 0.067    | kWh   |                                                 |
|                  | Ultra-sonication                           | 0.125    |       |                                                 |
|                  | Calcination                                | 2        |       |                                                 |
|                  | Oven drying                                | 0.4      |       |                                                 |
| Material Input   | Glass Fiber                                | 1.976    | kg    | 31 % weight loss of glass fiber as per TGA data |
|                  | Gallium (III) nitrate hydrate              | 0.1184   |       |                                                 |
|                  | Bis(acetylacetonate) dioxo-molybdenum (VI) | 0.10967  |       |                                                 |
|                  | Acetone                                    | 0.78     |       |                                                 |
|                  | Ammonium Hydroxide                         | 0.0257   |       |                                                 |
| Emissions to air | Waste Heat                                 | 3.4272   | MJ    |                                                 |
|                  | Acetone                                    | 0.35     | Kg    |                                                 |
| Transport        | Gallium (III) nitrate hydrate              | 0.00074  | Kg*Km |                                                 |
|                  | Bis(acetylacetonate) dioxo-                | 0.000685 |       |                                                 |

|        |                    |                |    |  |
|--------|--------------------|----------------|----|--|
|        | molybdenum (VI)    |                |    |  |
|        | Acetone            | 0.0048         |    |  |
|        | Ammonium Hydroxide | 0.00016        |    |  |
|        | <b>Total</b>       | <b>0.00638</b> |    |  |
| Output | Ga-Mo-GF catalyst  | 1              | Kg |  |

**Table S7.** LCI data for 1kg powdered corncob production

| Category        | Flow                 | Value   | Unit  | Comments |
|-----------------|----------------------|---------|-------|----------|
| Energy Input    | Electricity Consumed | 0.55    | kWh   |          |
| Material Input  | Corn Cob             | 1       | kg    |          |
| Emission To Air | Waste Heat           | 1.98    | MJ    |          |
| Transports      | Corn cob             | 0.00625 | Kg*Km |          |
| Output          | Powdered Corncob     | 1       | Kg    |          |

**Table S8.** LCI data for delignification of 1kg of corncob

| Category          | Flow                                | Value         | Unit  | Comments |
|-------------------|-------------------------------------|---------------|-------|----------|
| Energy Input      | Electricity Consumed                |               | kWh   |          |
|                   | Magnetic stirring and heating       | 0.3           |       |          |
|                   | Ultra sonication                    | 0.125         |       |          |
|                   | Hot air oven                        | 0.109         |       |          |
|                   | <b>Total</b>                        | <b>0.534</b>  |       |          |
| Material Input    | Powdered Corncob                    | 1             | Kg    |          |
|                   | Acetic Acid (98%)                   | 1.36          | Kg    |          |
|                   | H <sub>2</sub> O <sub>2</sub> (50%) | 0.30          | Kg    |          |
|                   | DI water                            | 1.5           | Kg    |          |
| Emission to air   | Waste Heat                          | 1.92          | MJ    |          |
|                   | Water Vapour                        | 0.075         | Kg    |          |
| Transport         | Acetic Acid (98%)                   | 0.0085        | Kg*Km |          |
|                   | H <sub>2</sub> O <sub>2</sub> (50%) | 0.00187       |       |          |
|                   | DI water                            | 0.0093        |       |          |
|                   | <b>Total</b>                        | <b>0.0197</b> |       |          |
| Waste of Material | Waste Water                         | 1.435         | Kg    |          |
| Output            | Cellulose                           | 0.3354        | Kg    |          |
|                   | Hemicellulose                       | 0.2218        |       |          |
|                   | <b>Holocellulose</b>                | <b>0.5572</b> |       |          |

**Table S9.** LCI data for 1kg fermentable sugar production using QHSR

| Category        | Flow                           | Value        | Unit  | Comments                                                                            |
|-----------------|--------------------------------|--------------|-------|-------------------------------------------------------------------------------------|
| Energy Input    | Electricity Consumption        |              | kWh   |                                                                                     |
|                 | For QHSR                       | 0.1          |       |                                                                                     |
|                 | Stirring                       | 0.028        |       |                                                                                     |
|                 | Vacuum evaporation             | 0.1          |       |                                                                                     |
|                 | <b>Total</b>                   | <b>0.111</b> | kWh   |                                                                                     |
| Material Input  | Holocellulose                  | 1.24         | Kg    | Considering 90% water recycling after product separation through vacuum evaporation |
|                 | Distilled water                | 1.0          | kg    |                                                                                     |
|                 | Ga <sup>4</sup> Mo-GF catalyst | 0.186        | Kg    |                                                                                     |
| Transport       | Distilled water                | 0.00625      | Kg*Km |                                                                                     |
| Emission to air | Waste heat                     | 0.3996       | MJ    |                                                                                     |
| Output          | Fermentable sugar              | 1            | kg    |                                                                                     |

**Table S10.** LCI data for detoxification and fermentation process for production bioethanol

| Category | Flow | Value | Unit |
|----------|------|-------|------|
|----------|------|-------|------|

|                 |                       | Neutralization | Over-liming | Solvent extraction | Ion-exchange |       |
|-----------------|-----------------------|----------------|-------------|--------------------|--------------|-------|
| Energy Input    | Electricity consumed  | 3.6            | 3.6         | 3.6                | 3.6          | kWh   |
| Material Input  | Fermentable sugar     | 1.462          | 1.771       | 1.1                | 1.11         | Kg    |
|                 | NaOH                  | 0.704          |             |                    |              |       |
|                 | Ca(OH) <sub>2</sub>   |                | 0.864       |                    |              |       |
|                 | Ethyl acetate         |                |             | 0.25               |              | kg    |
|                 | Amberlite IRP69 resin |                |             |                    | Recycled     | Kg    |
| Transport       |                       | 0.0044         | 0.0054      | 0.0016             | 0.002        | Kg*Km |
| Emission to air | Waste heat            | 12.96          | 12.96       | 12.96              | 12.96        | MJ    |
| Output          | Bioethanol            | 0.71           | 0.69        | 0.86               | 1            | kg    |
